# Supplementary material
Source: PubMed Central journal article supplement (PMC5697702)
Supplement: Supp_Fig1.pdf [file Supp_Fig1.pdf]

## Supplementary Data

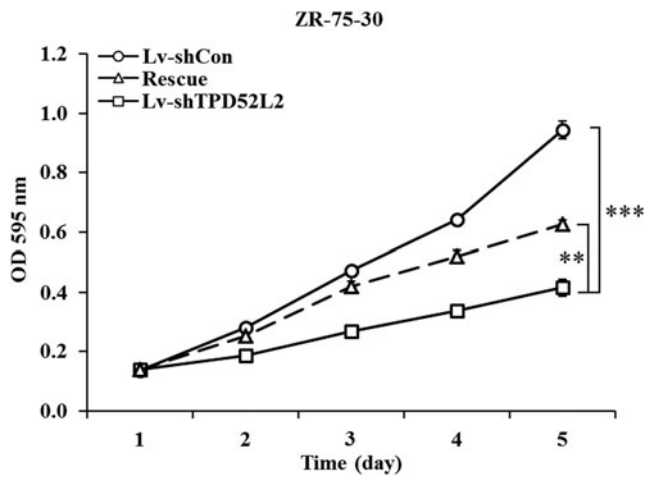

**SUPPLEMENTARY FIG. S1.** *TPD52L2* re-expression reversed the cell proliferation inhibition by RNAi. ZR-75-30 cell proliferation was measured by MTT assay. Data are represented as mean  $\pm$  standard deviation of three independent experiments. \*\*Represents  $p < 0.01$  and \*\*\*represents  $p < 0.001$ .
